# Supplementary material for: Clinical characteristics of pediatric inpatients infected with the SARS-CoV-2 Omicron variant—a retrospective observational cohort study
Source: PubMed Central journal article supplement — Transl Pediatr. 2023 Jul 25;12(7):1396–402. doi: 10.21037/tp-23-292 (PMC10416127; doi:10.21037/tp-23-292), 2023-07-25
Supplement: tp-12-07-1396-dss.pdf [file tp-12-07-1396-dss.pdf]

## Data Sharing Statement

|                     |                                                                                                                                                    |                                                                                                                     |
|---------------------|----------------------------------------------------------------------------------------------------------------------------------------------------|---------------------------------------------------------------------------------------------------------------------|
| <b>Article Info</b> | <a href="https://dx.doi.org/10.21037/tp-23-292">https://dx.doi.org/10.21037/tp-23-292</a>                                                          |                                                                                                                     |
| <b>Item</b>         | <b>Question</b>                                                                                                                                    | <b>Authors' Response<br/>(place "-" if not applicable)</b>                                                          |
| 1                   | Would you like to share data collected for your study to others?                                                                                   | Yes                                                                                                                 |
| 2                   | If not, would you like to share the reason for your decision?                                                                                      | -                                                                                                                   |
| 3                   | What data in particular will be shared?                                                                                                            | Clinical information of the included patients                                                                       |
| 4                   | Any other documents will be share? Such as study protocol, statistical analysis plan, informed consent form, clinical study report, analytic code. | Statistical analysis plan and the study protocol will also be shared if requested.                                  |
| 5                   | When will data availability begin?                                                                                                                 | From the publication date.                                                                                          |
| 6                   | When will data availability end?                                                                                                                   | Two years within the publication date, since the clinical practice regarding the pandemic may be updated over time. |
| 7                   | To whom will you share the data?                                                                                                                   | Researchers who are interested in the field of COVID-19 pediatric patients.                                         |
| 8                   | For what type of analysis or purpose?                                                                                                              | For the purpose to improve the management of COVID-19 pediatric patients.                                           |
| 9                   | How or where can the data/documents be obtained?                                                                                                   | Emails could be sent to the address below to obtain the shared data: xpdu2002@163.com                               |
| 10                  | Any other restrictions?                                                                                                                            | We may balance the potential benefits and risks for each request and then provide the data that could be shared.    |
